# Supplementary material for: Structural features of many circular and leaderless bacteriocins are similar to those in saposins and saposin-like peptides
Source: PubMed Central journal article supplement (PMC6072434; doi:10.1039/c6md00607h), 2017-01-11
Supplement: MD-008-C6MD00607H-s001.pdf [file MD-008-C6MD00607H-s001.pdf]

## Supporting information

SWISS-MODEL is an automated structure-homology modeling server that is available through the ExPASy web server.<sup>84</sup> The sequence for each bacteriocin was uploaded to the server followed by an automated search through the Research Collaboratory Structural Bioinformatics' (RCSB) Protein Data Bank (PDB) for a homologous peptide with an experimentally determined structure.<sup>85</sup> PDB coordinates of the peptide with the highest sequence-homology were used to create a structural model of each bacteriocin of interest.

### 1. Pneumocyclin

#### A) PDB file for model of pneumocyclin. Structure modeled after NKR-5-3B using SWISS-MODEL<sup>84</sup>

```
TITLE SWISS-MODEL SERVER (https://swissmodel.expasy.org)
TITLE 2 Untitled Project
EXPDTA THEORETICAL MODEL (SWISS-MODEL SERVER)
AUTHOR SWISS-MODEL SERVER (SEE REFERENCE IN JRNL
Records)
REVDAT 1 31-OCT-16 1MOD 1 15:24
JRNL AUTH
M.BIASINI,S.BIENERT,A.WATERHOUSE,K.ARNOLD,G.STUDER,
JRNL AUTH 2 T.SCHMIDT,F.KIEFER,T.GALLO
CASSARINO,M.BERTONI,L.BORDOLI,
JRNL AUTH 3 T.SCHWEDE
JRNL TITL SWISS-MODEL: MODELLING PROTEIN TERTIARY
AND QUATERNARY
JRNL TITL 2 STRUCTURE USING EVOLUTIONARY
INFORMATION
JRNL REF NUCLEIC.ACIDS.RES 2014
JRNL REFN ISSN 0305-1048
JRNL PMID 24782522
JRNL DOI 10.1093/nar/gku340
REMARK 3 MODEL INFORMATION
REMARK 3 ENGIN PROMOD3
REMARK 3 VERSN 1.0.1
REMARK 3 OSTAT MONOMER
REMARK 3 OSRSN USER
REMARK 3 GMQE 0.79
REMARK 3 QMN4 -1.18
REMARK 3 MODT FALSE
REMARK 3
REMARK 3 TEMPLATE 1
REMARK 3 PDBID 2mp8
REMARK 3 CHAIN A
REMARK 3 MMCIF A
REMARK 3 PDBV 2016-10-14
REMARK 3 SMTLE 2mp8.1A
REMARK 3 SMTLV 2016-10-19
REMARK 3 MTHD SOLUTION NMR 0.00 A
REMARK 3 FOUND HHblits
REMARK 3 GMQE 0.79
REMARK 3 SIM 0.40
REMARK 3 SID 43.75
REMARK 3 OSTAT monomer
ATOM 1 N LEU A 1 5.377 -3.179 1.001 1.00 0.75 N
ATOM 2 CA LEU A 1 4.201 -4.013 0.852 1.00 0.75 C
ATOM 3 C LEU A 1 4.594 -5.415 0.498 1.00 0.75 C
ATOM 4 O LEU A 1 4.214 -6.343 1.171 1.00 0.75 O
ATOM 5 CB LEU A 1 3.366 -3.247 -0.183 1.00 0.75 C
ATOM 6 CG LEU A 1 2.923 -1.834 0.250 1.00 0.75 C
ATOM 7 CD1 LEU A 1 2.299 -1.181 -0.987 1.00 0.75 C
ATOM 8 CD2 LEU A 1 1.992 -1.884 1.476 1.00 0.75 C
ATOM 9 N ALA A 2 5.395 -5.633 -0.563 1.00 0.74 N
ATOM 10 CA ALA A 2 5.744 -6.972 -0.972 1.00 0.74 C
ATOM 11 C ALA A 2 6.430 -7.903 0.044 1.00 0.74 C
ATOM 12 O ALA A 2 6.047 -9.051 0.194 1.00 0.74 O
ATOM 13 CB ALA A 2 6.627 -6.844 -2.216 1.00 0.74 C
ATOM 14 N GLY A 3 7.421 -7.382 0.793 1.00 0.70 N
ATOM 15 CA GLY A 3 8.158 -8.029 1.864 1.00 0.70 C
ATOM 16 C GLY A 3 7.369 -8.184 3.141 1.00 0.70 C
ATOM 17 O GLY A 3 7.422 -9.245 3.754 1.00 0.70 O
ATOM 18 N THR A 4 6.617 -7.154 3.605 1.00 0.68 N
ATOM 19 CA THR A 4 5.835 -7.268 4.852 1.00 0.68 C
ATOM 20 C THR A 4 4.537 -8.022 4.715 1.00 0.68 C
ATOM 21 O THR A 4 4.109 -8.717 5.636 1.00 0.68 O
ATOM 22 CB THR A 4 5.498 -5.972 5.580 1.00 0.68 C
ATOM 23 OG1 THR A 4 4.723 -5.061 4.795 1.00 0.68 O
ATOM 24 CG2 THR A 4 6.810 -5.286 5.969 1.00 0.68 C
ATOM 25 N LEU A 5 3.857 -7.886 3.565 1.00 0.69 N
ATOM 26 CA LEU A 5 2.564 -8.491 3.335 1.00 0.69 C
ATOM 27 C LEU A 5 2.699 -9.831 2.644 1.00 0.69 C
ATOM 28 O LEU A 5 1.785 -10.649 2.684 1.00 0.69 O
ATOM 29 CB LEU A 5 1.717 -7.595 2.398 1.00 0.69 C
ATOM 30 CG LEU A 5 1.561 -6.136 2.860 1.00 0.69 C
ATOM 31 CD1 LEU A 5 0.936 -5.323 1.725 1.00 0.69 C
ATOM 32 CD2 LEU A 5 0.732 -5.999 4.137 1.00 0.69 C
ATOM 33 N GLY A 6 3.851 -10.082 1.982 1.00 0.76 N
ATOM 34 CA GLY A 6 4.101 -11.315 1.245 1.00 0.76 C
ATOM 35 C GLY A 6 3.325 -11.381 -0.040 1.00 0.76 C
ATOM 36 O GLY A 6 2.784 -12.419 -0.417 1.00 0.76 O
ATOM 37 N ILE A 7 3.238 -10.241 -0.743 1.00 0.72 N
ATOM 38 CA ILE A 7 2.450 -10.082 -1.948 1.00 0.72 C
ATOM 39 C ILE A 7 3.369 -9.882 -3.126 1.00 0.72 C
ATOM 40 O ILE A 7 4.571 -9.657 -3.002 1.00 0.72 O
ATOM 41 CB ILE A 7 1.434 -8.933 -1.898 1.00 0.72 C
ATOM 42 CG1 ILE A 7 2.105 -7.556 -1.667 1.00 0.72 C
ATOM 43 CG2 ILE A 7 0.377 -9.288 -0.829 1.00 0.72 C
ATOM 44 CD1 ILE A 7 1.134 -6.374 -1.743 1.00 0.72 C
ATOM 45 N SER A 8 2.811 -9.971 -4.343 1.00 0.81 N
ATOM 46 CA SER A 8 3.535 -9.703 -5.569 1.00 0.81 C
ATOM 47 C SER A 8 3.850 -8.230 -5.753 1.00 0.81 C
ATOM 48 O SER A 8 3.212 -7.349 -5.178 1.00 0.81 O
ATOM 49 CB SER A 8 2.779 -10.222 -6.822 1.00 0.81 C
ATOM 50 OG SER A 8 1.522 -9.560 -7.025 1.00 0.81 O
ATOM 51 N THR A 9 4.847 -7.908 -6.598 1.00 0.76 N
ATOM 52 CA THR A 9 5.165 -6.537 -6.986 1.00 0.76 C
ATOM 53 C THR A 9 4.026 -5.881 -7.745 1.00 0.76 C
ATOM 54 O THR A 9 3.783 -4.683 -7.608 1.00 0.76 O
ATOM 55 CB THR A 9 6.427 -6.438 -7.829 1.00 0.76 C
ATOM 56 OG1 THR A 9 6.356 -7.284 -8.969 1.00 0.76 O
ATOM 57 CG2 THR A 9 7.624 -6.929 -7.009 1.00 0.76 C
ATOM 58 N LYS A 10 3.278 -6.679 -8.541 1.00 0.75 N
ATOM 59 CA LYS A 10 2.065 -6.280 -9.231 1.00 0.75 C
ATOM 60 C LYS A 10 0.979 -5.816 -8.284 1.00 0.75 C
ATOM 61 O LYS A 10 0.424 -4.733 -8.437 1.00 0.75 O
ATOM 62 CB LYS A 10 1.475 -7.489 -10.008 1.00 0.75 C
ATOM 63 CG LYS A 10 0.201 -7.170 -10.816 1.00 0.75 C
ATOM 64 CD LYS A 10 -0.345 -8.403 -11.560 1.00 0.75 C
ATOM 65 CE LYS A 10 -1.617 -8.103 -12.365 1.00 0.75 C
ATOM 66 NZ LYS A 10 -2.091 -9.315 -13.077 1.00 0.75 N
```







B)

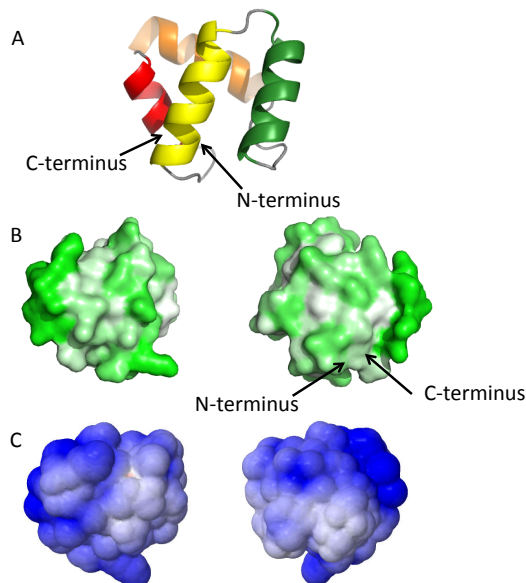

**Figure S1-** Structural models of pneumocyclin. A) Ribbon diagram depicting the saposin-like fold. The C- and N- termini are explicitly shown. Hydrophobic surface (B) and electrostatic potential surface (C) maps of pneumocyclin. Orientation peptide backbone in surface filling diagrams, B and C, correlate to one another.

## 2. Aureocyclin

### A) PDB file for model of aureocyclin. Structure modeled after NKR-5-3B using SWISS-MODEL.<sup>84</sup>

```

TITLE   SWISS-MODEL SERVER (https://swissmodel.expasy.org)
TITLE   2 Untitled Project
EXPDTA  THEORETICAL MODEL (SWISS-MODEL SERVER)
AUTHOR  SWISS-MODEL SERVER (SEE REFERENCE IN JRNL
Records)
REVDAT  1 31-OCT-16 1MOD 1 15:49
JRNL    AUTH
M.BIASINI,S.BIENERT,A.WATERHOUSE,K.ARNOLD,G.STUDER,
JRNL    AUTH 2 T.SCHMIDT,F.KIEFER,T.GALLO
CASSARINO,M.BERTONI,L.BORDOLI,
JRNL    AUTH 3 T.SCHWEDE
JRNL    TITL SWISS-MODEL: MODELLING PROTEIN TERTIARY
AND QUATERNARY
JRNL    TITL 2 STRUCTURE USING EVOLUTIONARY
INFORMATION
JRNL    REF  NUCLEIC.ACIDS.RES 2014
JRNL    REFN ISSN 0305-1048
JRNL    PMID 24782522
JRNL    DOI 10.1093/nar/gku340
REMARK  3 MODEL INFORMATION
REMARK  3 ENGIN PROMOD3
REMARK  3 VERSN 1.0.1
REMARK  3 OSTAT MONOMER
REMARK  3 OSRSN USER
REMARK  3 GMQE 0.68
REMARK  3 QMN4 -1.58
REMARK  3 MODT FALSE
REMARK  3
REMARK  3 TEMPLATE 1
REMARK  3 PDBID 2mp8
REMARK  3 CHAIN A
REMARK  3 MMCIF A
REMARK  3 PDBV 2016-10-14
REMARK  3 SMTLE 2mp8.1.A
REMARK  3 SMTLV 2016-10-19
REMARK  3 MTHD SOLUTION NMR 0.00 A
REMARK  3 FOUND HHblits
REMARK  3 GMQE 0.68
REMARK  3 SIM 0.38
REMARK  3 SID 36.84
REMARK  3 OSTAT monomer
ATOM    1 N LEU A 4 4.118 -7.799 3.715 1.00 0.49 N
ATOM    2 CA LEU A 4 2.872 -8.607 3.431 1.00 0.49 C
ATOM    3 C LEU A 4 2.972 -9.947 2.742 1.00 0.49 C
ATOM    4 O LEU A 4 2.131 -10.807 2.958 1.00 0.49 O
ATOM    5 CB LEU A 4 1.992 -7.724 2.568 1.00 0.49 C
ATOM    6 CG LEU A 4 1.872 -6.310 3.139 1.00 0.49 C
ATOM    7 CD1 LEU A 4 1.204 -5.517 2.071 1.00 0.49 C
ATOM    8 CD2 LEU A 4 1.086 -6.190 4.446 1.00 0.49 C
ATOM    9 N GLY A 5 3.996 -10.151 1.888 1.00 0.58 N
ATOM   10 CA GLY A 5 4.157 -11.403 1.146 1.00 0.58 C
ATOM   11 C GLY A 5 3.320 -11.453 -0.109 1.00 0.58 C
ATOM   12 O GLY A 5 2.771 -12.486 -0.469 1.00 0.58 O
ATOM   13 N ILE A 6 3.197 -10.304 -0.799 1.00 0.54 N

```









B)

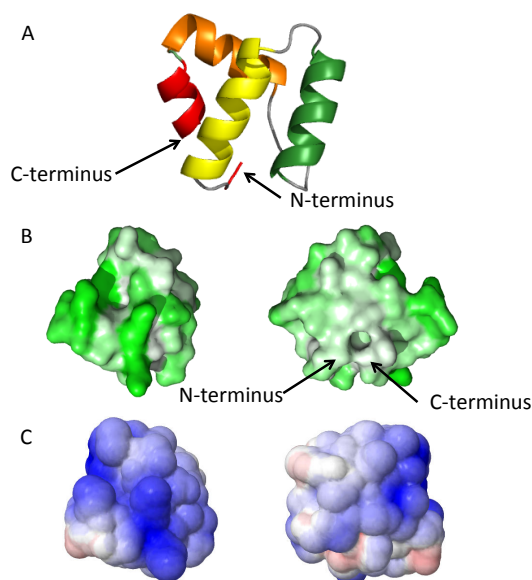

**Figure S2-** Structural models of aureocyclin. A) Ribbon diagram depicting the saaposin-like fold. The C- and N- termini are explicitly shown. Hydrophobic surface (B) and electrostatic potential surface (C) maps of aureocyclin. Orientation peptide backbone in the space filling diagrams, B and C, correlate to one another.

### 3) Amylocyclin

#### A) PDB file for model of amylocyclin. Structure modeled after NKR-5-3B using SWISS-MODEL<sup>84</sup>

|                                                     |                                                                                                  |        |   |          |                     |
|-----------------------------------------------------|--------------------------------------------------------------------------------------------------|--------|---|----------|---------------------|
| TITLE                                               | SWISS-MODEL SERVER ( <a href="https://swissmodel.expasy.org">https://swissmodel.expasy.org</a> ) | REMARK | 3 | ENGIN    | PROMOD3             |
| TITLE                                               | 2 Untitled Project                                                                               | REMARK | 3 | VERSN    | 1.0.1               |
| EXPDTA                                              | THEORETICAL MODEL (SWISS-MODEL SERVER)                                                           | REMARK | 3 | OSTAT    | MONOMER             |
| AUTHOR                                              | SWISS-MODEL SERVER (SEE REFERENCE IN JRNL Records)                                               | REMARK | 3 | OSRSN    | USER                |
| REVDAT                                              | 1 31-OCT-16 1MOD 1 16:08                                                                         | REMARK | 3 | GMQE     | 0.83                |
| JRNL                                                | AUTH                                                                                             | REMARK | 3 | QMN4     | -0.46               |
| M.BIASINI,S.BIENERT,A.WATERHOUSE,K.ARNOLD,G.STUDER, |                                                                                                  | REMARK | 3 | MODT     | FALSE               |
| JRNL                                                | AUTH 2 T.SCHMIDT,F.KIEFER,T.GALLO                                                                | REMARK | 3 | TEMPLATE | 1                   |
| CASSARINO,M.BERTONI,L.BORDOLI,                      |                                                                                                  | REMARK | 3 | PDBID    | 2mp8                |
| JRNL                                                | AUTH 3 T.SCHWEDE                                                                                 | REMARK | 3 | CHAIN    | A                   |
| JRNL                                                | TITL SWISS-MODEL: MODELLING PROTEIN TERTIARY AND QUATERNARY                                      | REMARK | 3 | MMCIF    | A                   |
| JRNL                                                | TITL 2 STRUCTURE USING EVOLUTIONARY INFORMATION                                                  | REMARK | 3 | PDBV     | 2016-10-14          |
| JRNL                                                | REF NUCLEIC.ACIDS.RES 2014                                                                       | REMARK | 3 | SMTLE    | 2mp8.1.A            |
| JRNL                                                | REFN ISSN 0305-1048                                                                              | REMARK | 3 | SMTLV    | 2016-10-19          |
| JRNL                                                | PMID 24782522                                                                                    | REMARK | 3 | MTHD     | SOLUTION NMR 0.00 A |
| JRNL                                                | DOI 10.1093/nar/gku340                                                                           | REMARK | 3 | FOUND    | HHblits             |
| REMARK                                              | 3                                                                                                | REMARK | 3 | GMQE     | 0.83                |
| REMARK                                              | 3 MODEL INFORMATION                                                                              | REMARK | 3 | SIM      | 0.47                |
|                                                     |                                                                                                  | REMARK | 3 | SID      | 60.94               |
|                                                     |                                                                                                  | REMARK | 3 | OSTAT    | monomer             |







|      |     |     |     |   |    |        |        |        |      |      |   |      |     |     |     |    |    |        |        |        |      |      |   |
|------|-----|-----|-----|---|----|--------|--------|--------|------|------|---|------|-----|-----|-----|----|----|--------|--------|--------|------|------|---|
| ATOM | 401 | CA  | LYS | A | 59 | 8.678  | 2.526  | -5.201 | 1.00 | 0.74 | C | ATOM | 427 | CA  | ALA | A  | 62 | 6.133  | -1.176 | -3.138 | 1.00 | 0.81 | C |
| ATOM | 402 | C   | LYS | A | 59 | 9.297  | 1.852  | -3.979 | 1.00 | 0.74 | C | ATOM | 428 | C   | ALA | A  | 62 | 6.975  | -2.370 | -2.670 | 1.00 | 0.81 | C |
| ATOM | 403 | O   | LYS | A | 59 | 9.439  | 0.631  | -3.933 | 1.00 | 0.74 | O | ATOM | 429 | O   | ALA | A  | 62 | 6.441  | -3.444 | -2.388 | 1.00 | 0.81 | O |
| ATOM | 404 | CB  | LYS | A | 59 | 9.763  | 2.913  | -6.218 | 1.00 | 0.74 | C | ATOM | 430 | CB  | ALA | A  | 62 | 6.379  | -0.867 | -4.633 | 1.00 | 0.81 | C |
| ATOM | 405 | CG  | LYS | A | 59 | 10.534 | 1.711  | -6.775 | 1.00 | 0.74 | C | ATOM | 431 | N   | ALA | A  | 63 | 8.294  | -2.146 | -2.479 | 1.00 | 0.74 | N |
| ATOM | 406 | CD  | LYS | A | 59 | 11.528 | 2.100  | -7.877 | 1.00 | 0.74 | C | ATOM | 432 | CA  | ALA | A  | 63 | 9.259  | -3.120 | -1.984 | 1.00 | 0.74 | C |
| ATOM | 407 | CE  | LYS | A | 59 | 12.664 | 2.993  | -7.373 | 1.00 | 0.74 | C | ATOM | 433 | C   | ALA | A  | 63 | 9.173  | -3.550 | -0.517 | 1.00 | 0.74 | C |
| ATOM | 408 | NZ  | LYS | A | 59 | 13.621 | 3.281  | -8.464 | 1.00 | 0.74 | N | ATOM | 434 | O   | ALA | A  | 63 | 9.517  | -4.701 | -0.227 | 1.00 | 0.74 | O |
| ATOM | 409 | N   | TYR | A | 60 | 9.672  | 2.640  | -2.943 | 1.00 | 0.73 | N | ATOM | 435 | CB  | ALA | A  | 63 | 10.698 | -2.625 | -2.198 | 1.00 | 0.74 | C |
| ATOM | 410 | CA  | TYR | A | 60 | 10.147 | 2.103  | -1.681 | 1.00 | 0.73 | C | ATOM | 436 | N   | TRP | A  | 64 | 8.777  | -2.622 | 0.402  | 1.00 | 0.68 | N |
| ATOM | 411 | C   | TYR | A | 60 | 9.045  | 1.316  | -1.008 | 1.00 | 0.73 | C | ATOM | 437 | CA  | TRP | A  | 64 | 8.705  | -2.737 | 1.859  | 1.00 | 0.68 | C |
| ATOM | 412 | O   | TYR | A | 60 | 9.221  | 0.177  | -0.583 | 1.00 | 0.73 | O | ATOM | 438 | C   | TRP | A  | 64 | 7.778  | -3.883 | 2.319  | 1.00 | 0.68 | C |
| ATOM | 413 | CB  | TYR | A | 60 | 10.582 | 3.257  | -0.735 | 1.00 | 0.73 | C | ATOM | 439 | O   | TRP | A  | 64 | 7.558  | -4.851 | 1.569  | 1.00 | 0.68 | O |
| ATOM | 414 | CG  | TYR | A | 60 | 10.969 | 2.759  | 0.636  | 1.00 | 0.73 | C | ATOM | 440 | CB  | TRP | A  | 64 | 8.153  | -1.391 | 2.462  | 1.00 | 0.68 | C |
| ATOM | 415 | CD1 | TYR | A | 60 | 9.993  | 2.560  | 1.627  | 1.00 | 0.73 | C | ATOM | 441 | CG  | TRP | A  | 64 | 7.682  | -1.295 | 3.939  | 1.00 | 0.68 | C |
| ATOM | 416 | CD2 | TYR | A | 60 | 12.291 | 2.418  | 0.922  | 1.00 | 0.73 | C | ATOM | 442 | CD1 | TRP | A  | 64 | 8.478  | -1.452 | 5.032  | 1.00 | 0.68 | C |
| ATOM | 417 | CE1 | TYR | A | 60 | 10.326 | 1.985  | 2.857  | 1.00 | 0.73 | C | ATOM | 443 | CD2 | TRP | A  | 64 | 6.315  | -1.328 | 4.454  | 1.00 | 0.68 | C |
| ATOM | 418 | CE2 | TYR | A | 60 | 12.634 | 1.883  | 2.171  | 1.00 | 0.73 | C | ATOM | 444 | NE1 | TRP | A  | 64 | 7.729  | -1.553 | 6.184  | 1.00 | 0.68 | N |
| ATOM | 419 | CZ  | TYR | A | 60 | 11.650 | 1.665  | 3.139  | 1.00 | 0.73 | C | ATOM | 445 | CE2 | TRP | A  | 64 | 6.402  | -1.510 | 5.845  | 1.00 | 0.68 | C |
| ATOM | 420 | OH  | TYR | A | 60 | 11.978 | 1.136  | 4.399  | 1.00 | 0.73 | O | ATOM | 446 | CE3 | TRP | A  | 64 | 5.065  | -1.252 | 3.833  | 1.00 | 0.68 | C |
| ATOM | 421 | N   | ALA | A | 61 | 7.845  | 1.928  | -0.919 | 1.00 | 0.83 | N | ATOM | 447 | CZ2 | TRP | A  | 64 | 5.263  | -1.632 | 6.634  | 1.00 | 0.68 | C |
| ATOM | 422 | CA  | ALA | A | 61 | 6.727  | 1.299  | -0.271 | 1.00 | 0.83 | C | ATOM | 448 | CZ3 | TRP | A  | 64 | 3.917  | -1.357 | 4.635  | 1.00 | 0.68 | C |
| ATOM | 423 | C   | ALA | A | 61 | 6.279  | 0.047  | -1.009 | 1.00 | 0.83 | C | ATOM | 449 | CH2 | TRP | A  | 64 | 4.013  | -1.554 | 6.012  | 1.00 | 0.68 | C |
| ATOM | 424 | O   | ALA | A | 61 | 5.865  | -0.907 | -0.399 | 1.00 | 0.83 | O | ATOM | 450 | OXT | TRP | A  | 64 | 7.105  | -3.771 | 3.364  | 1.00 | 0.68 | O |
| ATOM | 425 | CB  | ALA | A | 61 | 5.554  | 2.258  | -0.038 | 1.00 | 0.83 | C | TER  | 451 | TRP | A   | 64 |    |        |        |        |      |      |   |
| ATOM | 426 | N   | ALA | A | 62 | 6.420  | 0.008  | -2.359 | 1.00 | 0.81 | N | END  |     |     |     |    |    |        |        |        |      |      |   |

B)

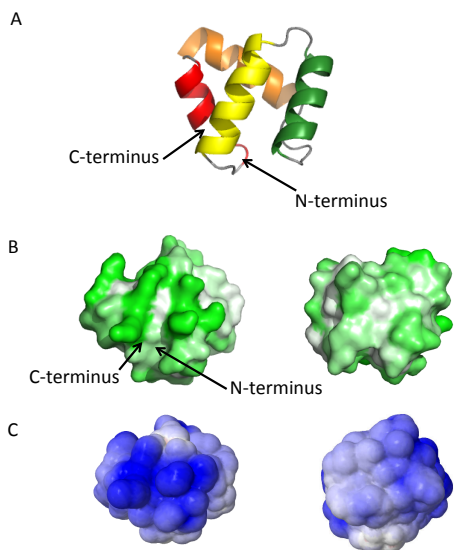

**Figure S3-** Structural models of amylocyclin. A) Ribbon diagram depicting the saposin-like fold. The C- and N- termini are explicitly shown. Hydrophobic surface (B) and electrostatic potential surface (C) maps of amylocyclin. Orientation peptide backbone in surface filling diagrams, B and C, correlate to one another.

## 4. Leucocyclin

### A) PDB file for model of leucocyclin. Structure modeled after NKR-5-3B using SWISS-MODEL<sup>84</sup>

TITLE SWISS-MODEL SERVER (<https://swissmodel.expasy.org>)  
TITLE 2 Untitled Project

EXPDTA THEORETICAL MODEL (SWISS-MODEL SERVER)

AUTHOR SWISS-MODEL SERVER (SEE REFERENCE IN JRNL  
Records)  
REVDAT 1 11-AUG-16 1MOD 1 23:52  
JRNL AUTH  
M.BIASINI,S.BIENERT,A.WATERHOUSE,K.ARNOLD,G.STUDER,  
JRNL AUTH 2 T.SCHMIDT,F.KIEFER,T.GALLO  
CASSARINO,M.BERTONI,L.BORDOLI,  
JRNL AUTH 3 T.SCHWEDE  
JRNL TITL SWISS-MODEL: MODELLING PROTEIN TERTIARY  
AND QUATERNARY  
JRNL TITL 2 STRUCTURE USING EVOLUTIONARY  
INFORMATION  
JRNL REF NUCLEIC.ACIDS.RES 2014  
JRNL REFN ISSN 0305-1048  
JRNL PMID 24782522  
JRNL DOI 10.1093/nar/gku340  
REMARK 3  
REMARK 3 MODEL INFORMATION  
REMARK 3 ENGIN PROMOD3  
REMARK 3 VERSN 1.0.0  
REMARK 3 OSTAT MONOMER  
REMARK 3 OSRSN PREDICTION  
REMARK 3 GMQE 0.66  
REMARK 3 QMN4 -1.92  
REMARK 3  
REMARK 3 TEMPLATE 1  
REMARK 3 PDBID 2mp8  
REMARK 3 CHAIN A  
REMARK 3 MMCIF A  
REMARK 3 PDBV 2016-07-29  
REMARK 3 SMTLE 2mp8.1.A  
REMARK 3 SMTLV 2016-08-03  
REMARK 3 MTHD SOLUTION NMR 0.00 A  
REMARK 3 FOUND HHblits  
REMARK 3 GMQE 0.66  
REMARK 3 SIM 0.36  
REMARK 3 SID 31.67  
REMARK 3 OSTAT monomer  
ATOM 1 N VAL A 4 5.370 -5.541 -0.615 1.00 0.72 N  
ATOM 2 CA VAL A 4 5.883 -6.910 -0.994 1.00 0.72 C  
ATOM 3 C VAL A 4 6.449 -7.673 0.163 1.00 0.72 C  
ATOM 4 O VAL A 4 5.908 -8.714 0.519 1.00 0.72 O  
ATOM 5 CB VAL A 4 6.841 -6.860 -2.184 1.00 0.72 C  
ATOM 6 CG1 VAL A 4 7.445 -8.224 -2.592 1.00 0.72 C  
ATOM 7 CG2 VAL A 4 6.030 -6.366 -3.384 1.00 0.72 C  
ATOM 8 N ASN A 5 7.514 -7.163 0.800 1.00 0.70 N  
ATOM 9 CA ASN A 5 8.191 -7.839 1.891 1.00 0.70 C  
ATOM 10 C ASN A 5 7.354 -8.123 3.135 1.00 0.70 C  
ATOM 11 O ASN A 5 7.357 -9.241 3.637 1.00 0.70 O  
ATOM 12 CB ASN A 5 9.401 -6.995 2.343 1.00 0.70 C  
ATOM 13 CG ASN A 5 10.461 -6.974 1.250 1.00 0.70 C  
ATOM 14 OD1 ASN A 5 10.573 -7.870 0.413 1.00 0.70 O  
ATOM 15 ND2 ASN A 5 11.301 -5.913 1.258 1.00 0.70 N  
ATOM 16 N GLN A 6 6.611 -7.141 3.671 1.00 0.75 N  
ATOM 17 CA GLN A 6 5.860 -7.321 4.900 1.00 0.75 C  
ATOM 18 C GLN A 6 4.523 -8.021 4.732 1.00 0.75 C  
ATOM 19 O GLN A 6 4.044 -8.711 5.627 1.00 0.75 O  
ATOM 20 CB GLN A 6 5.616 -5.947 5.560 1.00 0.75 C  
ATOM 21 CG GLN A 6 6.912 -5.224 5.994 1.00 0.75 C  
ATOM 22 CD GLN A 6 7.666 -6.028 7.049 1.00 0.75 C  
ATOM 23 OE1 GLN A 6 7.120 -6.429 8.076 1.00 0.75 O  
ATOM 24 NE2 GLN A 6 8.976 -6.271 6.809 1.00 0.75 N  
ATOM 25 N LEU A 7 3.878 -7.859 3.564 1.00 0.72 N  
ATOM 26 CA LEU A 7 2.585 -8.463 3.302 1.00 0.72 C  
ATOM 27 C LEU A 7 2.708 -9.826 2.631 1.00 0.72 C  
ATOM 28 O LEU A 7 1.779 -10.627 2.660 1.00 0.72 O  
ATOM 29 CB LEU A 7 1.756 -7.553 2.356 1.00 0.72 C  
ATOM 30 CG LEU A 7 1.557 -6.099 2.832 1.00 0.72 C  
ATOM 31 CD1 LEU A 7 0.942 -5.250 1.707 1.00 0.72 C

ATOM 32 CD2 LEU A 7 0.706 -6.024 4.108 1.00 0.72 C  
ATOM 33 N GLY A 8 3.863 -10.123 1.994 1.00 0.84 N  
ATOM 34 CA GLY A 8 4.078 -11.358 1.238 1.00 0.84 C  
ATOM 35 C GLY A 8 3.291 -11.435 -0.053 1.00 0.84 C  
ATOM 36 O GLY A 8 2.777 -12.482 -0.433 1.00 0.84 O  
ATOM 37 N ILE A 9 3.178 -10.295 -0.762 1.00 0.74 N  
ATOM 38 CA ILE A 9 2.358 -10.123 -1.953 1.00 0.74 C  
ATOM 39 C ILE A 9 3.261 -9.955 -3.155 1.00 0.74 C  
ATOM 40 O ILE A 9 4.470 -9.792 -3.030 1.00 0.74 O  
ATOM 41 CB ILE A 9 1.389 -8.937 -1.886 1.00 0.74 C  
ATOM 42 CG1 ILE A 9 2.096 -7.573 -1.668 1.00 0.74 C  
ATOM 43 CG2 ILE A 9 0.341 -9.282 -0.809 1.00 0.74 C  
ATOM 44 CD1 ILE A 9 1.145 -6.372 -1.740 1.00 0.74 C  
ATOM 45 N SER A 10 2.716 -9.983 -4.385 1.00 0.84 N  
ATOM 46 CA SER A 10 3.498 -9.716 -5.582 1.00 0.84 C  
ATOM 47 C SER A 10 3.818 -8.237 -5.768 1.00 0.84 C  
ATOM 48 O SER A 10 3.170 -7.356 -5.205 1.00 0.84 O  
ATOM 49 CB SER A 10 2.815 -10.254 -6.872 1.00 0.84 C  
ATOM 50 OG SER A 10 1.608 -9.550 -7.183 1.00 0.84 O  
ATOM 51 N LYS A 11 4.836 -7.912 -6.598 1.00 0.75 N  
ATOM 52 CA LYS A 11 5.141 -6.542 -6.998 1.00 0.75 C  
ATOM 53 C LYS A 11 4.009 -5.882 -7.773 1.00 0.75 C  
ATOM 54 O LYS A 11 3.780 -4.682 -7.657 1.00 0.75 O  
ATOM 55 CB LYS A 11 6.451 -6.462 -7.812 1.00 0.75 C  
ATOM 56 CG LYS A 11 7.688 -6.849 -6.989 1.00 0.75 C  
ATOM 57 CD LYS A 11 8.973 -6.781 -7.829 1.00 0.75 C  
ATOM 58 CE LYS A 11 10.235 -7.150 -7.042 1.00 0.75 C  
ATOM 59 NZ LYS A 11 11.427 -7.101 -7.920 1.00 0.75 N  
ATOM 60 N SER A 12 3.258 -6.688 -8.555 1.00 0.80 N  
ATOM 61 CA SER A 12 2.033 -6.277 -9.237 1.00 0.80 C  
ATOM 62 C SER A 12 0.972 -5.789 -8.262 1.00 0.80 C  
ATOM 63 O SER A 12 0.479 -4.668 -8.358 1.00 0.80 O  
ATOM 64 CB SER A 12 1.435 -7.471 -10.037 1.00 0.80 C  
ATOM 65 OG SER A 12 0.272 -7.104 -10.780 1.00 0.80 O  
ATOM 66 N LEU A 13 0.665 -6.598 -7.223 1.00 0.74 N  
ATOM 67 CA LEU A 13 -0.262 -6.215 -6.176 1.00 0.74 C  
ATOM 68 C LEU A 13 0.219 -5.013 -5.384 1.00 0.74 C  
ATOM 69 O LEU A 13 -0.549 -4.105 -5.102 1.00 0.74 O  
ATOM 70 CB LEU A 13 -0.545 -7.394 -5.216 1.00 0.74 C  
ATOM 71 CG LEU A 13 -1.354 -8.558 -5.825 1.00 0.74 C  
ATOM 72 CD1 LEU A 13 -1.357 -9.751 -4.856 1.00 0.74 C  
ATOM 73 CD2 LEU A 13 -2.793 -8.151 -6.180 1.00 0.74 C  
ATOM 74 N ALA A 14 1.510 -4.950 -5.033 1.00 0.80 N  
ATOM 75 CA ALA A 14 2.100 -3.826 -4.340 1.00 0.80 C  
ATOM 76 C ALA A 14 2.080 -2.489 -5.070 1.00 0.80 C  
ATOM 77 O ALA A 14 1.812 -1.452 -4.472 1.00 0.80 O  
ATOM 78 CB ALA A 14 3.539 -4.194 -4.023 1.00 0.80 C  
ATOM 79 N ASN A 15 2.340 -2.481 -6.388 1.00 0.75 N  
ATOM 80 CA ASN A 15 2.139 -1.334 -7.252 1.00 0.75 C  
ATOM 81 C ASN A 15 0.660 -0.912 -7.330 1.00 0.75 C  
ATOM 82 O ASN A 15 0.310 0.266 -7.333 1.00 0.75 O  
ATOM 83 CB ASN A 15 2.721 -1.677 -8.640 1.00 0.75 C  
ATOM 84 CG ASN A 15 2.786 -0.425 -9.501 1.00 0.75 C  
ATOM 85 OD1 ASN A 15 3.420 0.567 -9.143 1.00 0.75 O  
ATOM 86 ND2 ASN A 15 2.100 -0.448 -10.664 1.00 0.75 N  
ATOM 87 N THR A 16 -0.264 -1.885 -7.368 1.00 0.75 N  
ATOM 88 CA THR A 16 -1.702 -1.639 -7.239 1.00 0.75 C  
ATOM 89 C THR A 16 -2.102 -1.044 -5.891 1.00 0.75 C  
ATOM 90 O THR A 16 -2.887 -0.096 -5.825 1.00 0.75 O  
ATOM 91 CB THR A 16 -2.510 -2.892 -7.528 1.00 0.75 C  
ATOM 92 OG1 THR A 16 -2.318 -3.274 -8.883 1.00 0.75 O  
ATOM 93 CG2 THR A 16 -4.016 -2.666 -7.365 1.00 0.75 C  
ATOM 94 N ILE A 17 -1.528 -1.543 -4.769 1.00 0.69 N  
ATOM 95 CA ILE A 17 -1.676 -0.970 -3.424 1.00 0.69 C  
ATOM 96 C ILE A 17 -1.184 0.439 -3.400 1.00 0.69 C  
ATOM 97 O ILE A 17 -1.841 1.343 -2.892 1.00 0.69 O  
ATOM 98 CB ILE A 17 -0.878 -1.709 -2.344 1.00 0.69 C  
ATOM 99 CG1 ILE A 17 -1.422 -3.121 -2.103 1.00 0.69 C









B)

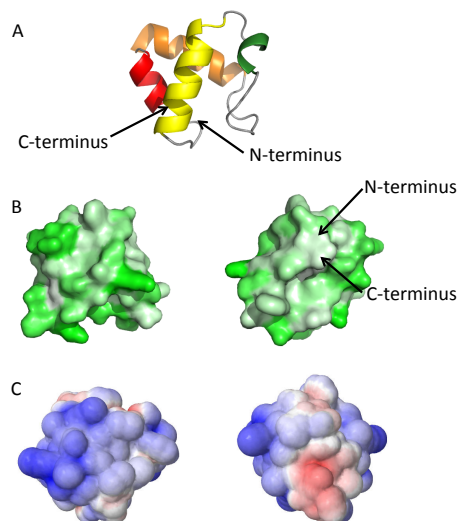

**Figure S4-** Structural models of leucocyclicin. A) Ribbon diagram depicting the saposin-like fold. The C- and N- termini are explicitly shown. Hydrophobic surface (B) and electrostatic potential surface (C) maps of leucocyclicin. Orientation peptide backbone in surface filling diagrams, B and C, correlate to one another.

## 5. Garvacin ML

### A) PDB file for model of garvacin ML. Structure modeled after AS-48 using SWISS-MODEL<sup>84</sup>

```

TITLE  SWISS-MODEL SERVER (https://swissmodel.expasy.org)
TITLE  2 Untitled Project
EXPDTA  THEORETICAL MODEL (SWISS-MODEL SERVER)
AUTHOR  SWISS-MODEL SERVER (SEE REFERENCE IN JRNL
Records)
REVDAT  1 11-AUG-16 1MOD  1  22:28
JRNL  AUTH
M.BIASINI,S.BIENERT,A.WATERHOUSE,K.ARNOLD,G.STUDER,
JRNL  AUTH 2 T.SCHMIDT,F.KIEFER,T.GALLO
CASSARINO,M.BERTONI,L.BORDOLI,
JRNL  AUTH 3 T.SCHWEDE
JRNL  TITL  SWISS-MODEL: MODELLING PROTEIN TERTIARY
AND QUATERNARY
JRNL  TITL 2 STRUCTURE USING EVOLUTIONARY
INFORMATION
JRNL  REF  NUCLEIC.ACIDS.RES  2014
JRNL  REFN  ISSN 0305-1048
JRNL  PMID  24782522
JRNL  DOI  10.1093/nar/gku340
REMARK  3
REMARK  3 MODEL INFORMATION
REMARK  3 ENGIN  PROMOD3
REMARK  3 VERSN  1.0.0
REMARK  3 OSTAT  MONOMER
REMARK  3 OSRSN  PREDICTION
REMARK  3 GMQE  0.65
REMARK  3 QMN4  -1.90
REMARK  3
REMARK  3 TEMPLATE 1
REMARK  3 PDBID  4rgd
REMARK  3 CHAIN  A
REMARK  3 MMCIF  A
REMARK  3 PDBV  2016-07-29
REMARK  3 SMTLE  4rgd.1.A
REMARK  3 SMTLV  2016-08-03
REMARK  3 MTHD  X-RAY DIFFRACTION 1.20 A
REMARK  3 FOUND  HHblits
REMARK  3 GMQE  0.65
REMARK  3 SIM  0.37
REMARK  3 SID  35.71
REMARK  3 OSTAT  homo-dimer
REMARK  3 LIGND  CIT
ATOM  1  N  THR  A  4  55.986 -2.970 89.102 1.00 0.34  N
ATOM  2  CA  THR  A  4  55.526 -2.404 87.777 1.00 0.34  C
ATOM  3  C  THR  A  4  56.617 -2.286 86.715 1.00 0.34  C
ATOM  4  O  THR  A  4  56.298 -2.050 85.596 1.00 0.34  O
ATOM  5  CB  THR  A  4  54.855 -1.023 87.967 1.00 0.34  C
ATOM  6  OG1 THR  A  4  55.684 -0.173 88.743 1.00 0.34  O
ATOM  7  CG2 THR  A  4  53.540 -1.159 88.758 1.00 0.34  C
ATOM  8  N  GLY  A  5  57.944 -2.498 87.008 1.00 0.40  N
ATOM  9  CA  GLY  A  5  58.934 -2.311 85.933 1.00 0.40  C
ATOM 10  C  GLY  A  5  59.203 -0.881 85.550 1.00 0.40  C
ATOM 11  O  GLY  A  5  59.780 -0.607 84.506 1.00 0.40  O
ATOM 12  N  MET  A  6  58.809  0.081 86.409 1.00 0.53  N
ATOM 13  CA  MET  A  6  59.205  1.459 86.267 1.00 0.53  C
ATOM 14  C  MET  A  6  60.640  1.570 86.645 1.00 0.53  C
ATOM 15  O  MET  A  6  61.020  1.242 87.759 1.00 0.53  O
ATOM 16  CB  MET  A  6  58.385  2.407 87.176 1.00 0.53  C

```









B)

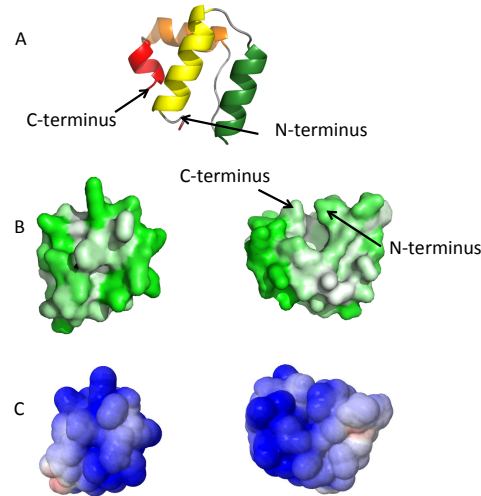

**Figure S5-** Structural models of garvacin ML. A) Ribbon diagram depicting the saposin-like fold. The C- and N- termini are explicitly shown. Hydrophobic surface (B) and electrostatic potential surface (C) maps of garvacin ML. Orientation peptide backbone in surface filling diagrams, B and C, correlate to one another.

## 6.Mutacin BhtB

### A) PDB file for model of Mutacin BhtB. Structure modeled after lacticin Q using SWISS-MODEL<sup>84</sup>

```

TITLE  SWISS-MODEL SERVER (https://swissmodel.expasy.org)
TITLE  2 Untitled Project
EXPDTA  THEORETICAL MODEL (SWISS-MODEL SERVER)
AUTHOR  SWISS-MODEL SERVER (SEE REFERENCE IN JRNL
Records)
REVDAT  1 15-AUG-16 1MOD  1  21:39
JRNL  AUTH
M.BIASINI,S.BIENERT,A.WATERHOUSE,K.ARNOLD,G.STUDER,
JRNL  AUTH 2 T.SCHMIDT,F.KIEFER,T.GALLO
CASSARINO,M.BERTONI,L.BORDOLI,
JRNL  AUTH 3 T.SCHWEDE
JRNL  TITL  SWISS-MODEL: MODELLING PROTEIN TERTIARY
AND QUATERNARY
JRNL  TITL 2 STRUCTURE USING EVOLUTIONARY
INFORMATION
JRNL  REF  NUCLEIC.ACIDS.RES  2014
JRNL  REFN  ISSN 0305-1048
JRNL  PMID  24782522
JRNL  DOI  10.1093/nar/gku340
REMARK  3
REMARK  3 MODEL INFORMATION
REMARK  3 ENGIN  PROMOD3
REMARK  3 VERSN  1.0.0
REMARK  3 OSTAT  MONOMER
REMARK  3 OSRSN  USER
REMARK  3 GMQE  0.74
REMARK  3 QMN4  -1.71
REMARK  3
REMARK  3 TEMPLATE 1
REMARK  3 PDBID  2n8p
REMARK  3 CHAIN  A
REMARK  3 MMCIF  A
REMARK  3 PDBV  2016-08-12
REMARK  3 SMTLE  2n8p.1.A
REMARK  3 SMTLV  2016-08-14
REMARK  3 MTHD  SOLUTION NMR 0.00 A
REMARK  3 FOUND  HHblits
REMARK  3 GMQE  0.74
REMARK  3 SIM  0.43
REMARK  3 SID  45.24
REMARK  3 OSTAT  monomer
ATOM  1  N  TRP A  2  9.109 -0.818 -0.130 1.00 0.48  N
ATOM  2  CA  TRP A  2  10.436 -1.289 -0.665 1.00 0.48  C
ATOM  3  C  TRP A  2  10.867 -0.538 -1.927 1.00 0.48  C
ATOM  4  O  TRP A  2  11.803 0.265 -1.816 1.00 0.48  O
ATOM  5  CB  TRP A  2  10.478 -2.840 -0.737 1.00 0.48  C
ATOM  6  CG  TRP A  2  11.868 -3.431 -0.982 1.00 0.48  C
ATOM  7  CD1  TRP A  2  13.012 -3.412 -0.217 1.00 0.48  C
ATOM  8  CD2  TRP A  2  12.196 -4.175 -2.166 1.00 0.48  C
ATOM  9  NE1  TRP A  2  14.021 -4.105 -0.853 1.00 0.48  N
ATOM  10  CE2  TRP A  2  13.539 -4.578 -2.042 1.00 0.48  C
ATOM  11  CE3  TRP A  2  11.445 -4.512 -3.289 1.00 0.48  C
ATOM  12  CZ2  TRP A  2  14.154 -5.326 -3.029 1.00 0.48  C
ATOM  13  CZ3  TRP A  2  12.069 -5.276 -4.285 1.00 0.48  C
ATOM  14  CH2  TRP A  2  13.401 -5.686 -4.152 1.00 0.48  C
ATOM  15  N  GLY A  3  10.233 -0.618 -3.127 1.00 0.61  N
ATOM  16  CA  GLY A  3  10.771 0.129 -4.291 1.00 0.61  C
ATOM  17  C  GLY A  3  10.911 1.649 -4.148 1.00 0.61  C

```









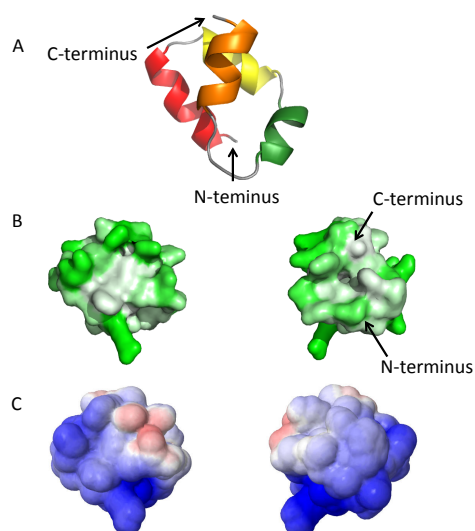

**Figure S6-** Structural models of mutacin BhtB. A) Ribbon diagram depicting the saposin-like fold. The C- and N- termini are explicitly shown. Hydrophobic surface (B) and electrostatic potential surface (C) maps of mutacin BhtB. Orientation peptide backbone in surface filling diagrams, B and C, correlate to one another.

References:

84 M. Biasini, S. Bienert, A. Waterhouse, K. Arnold, G. Studer, T. Schmidt, F. Kiefer, T. G. Cassarino, M. Bertoni, L. Bordoli and T. Schwede, *Nucleic Acids Res.*, 2014, **42**, 252–258.

85 H. M. Berman, J. Westbrook, Z. Feng, G. Gilliland, T. N. Bhat, H. Weissig, I. N. Shindyalov and P. E. Bourne, *Nucleic Acids Res.*, 2000, **28**, 235–242.
